# Supplementary material for: Large-scale clinical validation of biomarkers for pancreatic cancer using a mass spectrometry-based proteomics approach
Source: PubMed Central journal article supplement (PMC5522104; doi:10.18632/oncotarget.17463), 2017-04-27
Supplement: oncotarget-08-42761-s001.pdf [file oncotarget-08-42761-s001.pdf]

## Large-scale clinical validation of biomarkers for pancreatic cancer using a mass spectrometry-based proteomics approach

### Supplementary Materials

**Supplementary Table 1: Proteins identified using pathway-based gene expression meta-analysis and shotgun proteomics in the discovery phase.** See Supplementary\_Table\_1

**Supplementary Table 2: Immunohistochemistry staining results of 9 proteins**

| Gene Symbol | Positive case (%) |                      |                       |
|-------------|-------------------|----------------------|-----------------------|
|             | Normal duct       | Duct in Pancreatitis | Ductal Adenocarcinoma |
| MUC1        | 0% (0/70)         | 27.1% (19/70)        | 64.3% (45/70)         |
| MUC4        | 0% (0/70)         | 0% (0/70)            | 61.4% (43/70)         |
| MUC5AC      | 0% (0/70)         | 21.4% (15/70)        | 42.8% (30/70)         |
| SERPINB5    | 0% (0/70)         | 17.1% (12/70)        | 31.4% (22/70)         |
| ERBB2       | 0% (0/70)         | 15.7% (11/70)        | 12.9% (9/70)          |
| VCAN        | 0% (0/70)         | 7.14% (5/70)         | 51.4% (36/70)         |
| NOTCH3      | 0% (0/70)         | 31.4% (22/70)        | 61.4% (43/70)         |
| ATP5D       | 14.3% (10/70)     | 35.7% (25/70)        | 64.3% (45/70)         |
| TIMP1       | 0% (0/70)         | 2.3% (2/70)          | 75.7% (53/70)         |

**Supplementary Table 3: MRM transitions for 9 proteins**

| Marker                                       | Q1     | Q3     | dwell time (msec) | peptide sequence | Target ion | Collision energy (eV) |
|----------------------------------------------|--------|--------|-------------------|------------------|------------|-----------------------|
| Alpha-1-acid glycoprotein 2                  | 497.76 | 764.43 | 40                | TEDTIFLR         | +2y6       | 26.8                  |
|                                              | 497.76 | 649.40 | 40                |                  | +2y5       | 26.8                  |
|                                              | 501.27 | 771.45 | 40                | TEDTIFL*R        | +2y6       | IS 26.8               |
|                                              | 501.27 | 656.42 | 40                |                  | +2y5       | 26.8                  |
| Apolipoprotein A-IV                          | 488.26 | 775.39 | 40                | ISASAEELR        | +2y7       | 26.4                  |
|                                              | 488.26 | 704.36 | 40                |                  | +2y6       | 26.4                  |
|                                              | 491.77 | 782.41 | 40                | ISASAEEL*R       | +2y7       | IS 26.4               |
|                                              | 491.77 | 711.37 | 40                |                  | +2y6       | 26.4                  |
| Apolipoprotein CIII                          | 598.80 | 953.49 | 40                | GWVTDGFSSLK      | +2y9       | 30.4                  |
|                                              | 598.80 | 854.43 | 40                |                  | +2y8       | 30.4                  |
|                                              | 602.31 | 960.51 | 40                | GWVTDGFSSL*K     | +2y9       | IS 30.4               |
|                                              | 602.31 | 861.44 | 40                |                  | +2y8       | 30.4                  |
| Insulin-like growth factor binding protein 2 | 484.80 | 742.42 | 40                | LIQGAPTIR        | +2y7       | 26.3                  |
|                                              | 484.80 | 614.36 | 40                |                  | +2y6       | 26.3                  |
|                                              | 487.80 | 748.43 | 40                | LIQGAP*TIR       | +2y7       | IS 26.3               |
|                                              | 487.80 | 620.38 | 40                |                  | +2y6       | 26.3                  |
| Pancreatic triacylglycerol lipase            | 395.74 | 604.37 | 40                | VSVTLSGK         | +2y6       | 23.1                  |
|                                              | 395.74 | 505.30 | 40                |                  | +2y5       | 23.1                  |
|                                              | 399.25 | 611.38 | 40                | VSVTL*SGK        | +2y6       | IS 23.1               |
|                                              | 399.25 | 512.32 | 40                |                  | +2y5       | 23.1                  |
| Pregnancy zone protein                       | 443.72 | 723.38 | 40                | YGAATFTR         | +2y7       | 24.8                  |
|                                              | 443.72 | 595.32 | 40                |                  | +2y5       | 24.8                  |
|                                              | 448.74 | 733.41 | 40                | YGAATF*TR        | +2y7       | IS 24.8               |
|                                              | 448.74 | 605.35 | 40                |                  | +2y5       | 24.8                  |
| Inhibitor of metalloproteinase 1             | 617.31 | 830.44 | 40                | GFQALGDAADIR     | +2y8       | 31.1                  |
|                                              | 617.31 | 717.35 | 40                |                  | +2y7       | 31.1                  |
|                                              | 620.82 | 837.45 | 40                | GFQALGDAADI*R    | +2y8       | IS 31.1               |
|                                              | 620.82 | 724.37 | 40                |                  | +2y7       | 31.1                  |
| Mucin 5AC glycoprotein                       | 512.77 | 709.44 | 40                | AEDAPGVPLR       | +2y7       | 27.3                  |
|                                              | 512.77 | 638.40 | 40                |                  | +2y6       | 27.3                  |
|                                              | 516.28 | 716.45 | 40                | AEDAPGVPL*R      | +2y7       | IS 27.3               |
|                                              | 516.28 | 645.42 | 40                |                  | +2y6       | 27.3                  |
| Calmodulin-like protein 5                    | 465.75 | 703.37 | 40                | NLSEAQLR         | +2y6       | 25.6                  |
|                                              | 465.75 | 616.34 | 40                |                  | +2y5       | 25.6                  |
|                                              | 469.26 | 710.39 | 40                | NLSEAQL*R        | +2y6       | IS 25.6               |
|                                              | 469.26 | 623.36 | 40                |                  | +2y5       | 25.6                  |

**Supplementary Table 4: Antibodies used in this study**

| <b>Antibody</b> | <b>Incubation time</b> | <b>Dilution</b> | <b>Supplier</b> |
|-----------------|------------------------|-----------------|-----------------|
| MUC1            | 20 min                 | 1:200           | Novocastra      |
| MUC4            | 20 min                 | 1:100           | Santa Cruz      |
| MUC5AC          | 20 min                 | 1:200           | Novocastra      |
| TIMP1           | 20 min                 | 1:200           | DAKO            |
| ERBB2           | 20 min                 | 1:300           | Novocastra      |
| VCAN            | 20 min                 | 1:50            | Novus           |
| NOTCH3          | 20 min                 | 1:150           | Novus           |
| ATP5D           | 20 min                 | 1:150           | Sigma           |
| SERPINB5        | 90 min                 | 1:100           | BD Biosciences  |
